# Supplementary material
Source: MDPI journal article supplement (https://www.mdpi.com/2304-6740/9/10/77)
Supplement: s1 [file s1]

*Supplementary Materials*

# Nanostructure and Luminescent Properties of Bimetallic Lanthanide Eu/Gd, Tb/Gd and Eu/Tb Coordination Polymers

Helena Brunckova <sup>1,\*</sup>, Erika Mudra <sup>1</sup>, Lucas Rocha <sup>2</sup>, Eduardo Nassar <sup>2</sup>, Willian Nascimento <sup>2</sup>, Hristo Kolev <sup>3</sup>, Maksym Lisnichuk <sup>1</sup>, Alexandra Kovalcikova <sup>1</sup>, Zuzana Molcanova <sup>1</sup>, Magdalena Streckova <sup>1</sup> and Lubomir Medvecký <sup>1</sup>

<sup>1</sup> Institute of Materials Research, Slovak Academy of Sciences, Watsonova 47, 040 01 Kosice, Slovakia; emudra@saske.sk (E.M.); mlisnichuk@saske.sk (M.L.); akovalcikova@saske.sk (A.K.); molcanova@saske.sk (Z.M.); mstreckova@saske.sk (M.S.); lmedvecký@saske.sk (L.M.)

<sup>2</sup> Universidade de Franca, Science & Technology, Av. Armando Salles Oliveira, 201, 14404-600 Franca, Brazil; lucas.rocha@unifran.edu.br (L.R.); eduardo.nassar@unifran.edu.br (E.N.); willianenmelo@outlook.com (W.N.)

<sup>3</sup> Institute of Catalysis, Bulgarian Academy of Sciences, Acad. G. Bonchev St., BU-1113 Sofia, Bulgaria; hgkolev@gmail.com

\* Correspondence: hbrunckova@saske.sk; Tel.: +421-55-7922-455

**Citation:** Brunckova, H.; Mudra, E.; Rocha, L.; Nassar, E.; Nascimento, W.; Kolev, H.; Lisnichuk, M.; Kovalcikova, A.; Molcanova, Z.; Streckova, M.; et al. Nanostructure and Luminescent Properties of Bimetallic Lanthanide Eu/Gd, Tb/Gd and Eu/Tb Coordination Polymers. *Inorganics* **2021**, *9*, 77.  
<https://doi.org/10.3390/10.3390/inorganics9100077>

Academic Editor(s): Lars Öhrström, Susan Bourne and Francoise M. Amombo Noa

Received: 6 September 2021

Accepted: 13 October 2021

Published: 15 October 2021

**Publisher's Note:** MDPI stays neutral with regard to jurisdictional claims in published maps and institutional affiliations.

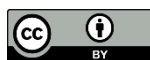

**Copyright:** © 2021 by the authors. Licensee MDPI, Basel, Switzerland. This article is an open access article distributed under the terms and conditions of the Creative Commons Attribution (CC BY) license (<http://creativecommons.org/licenses/by/4.0/>).

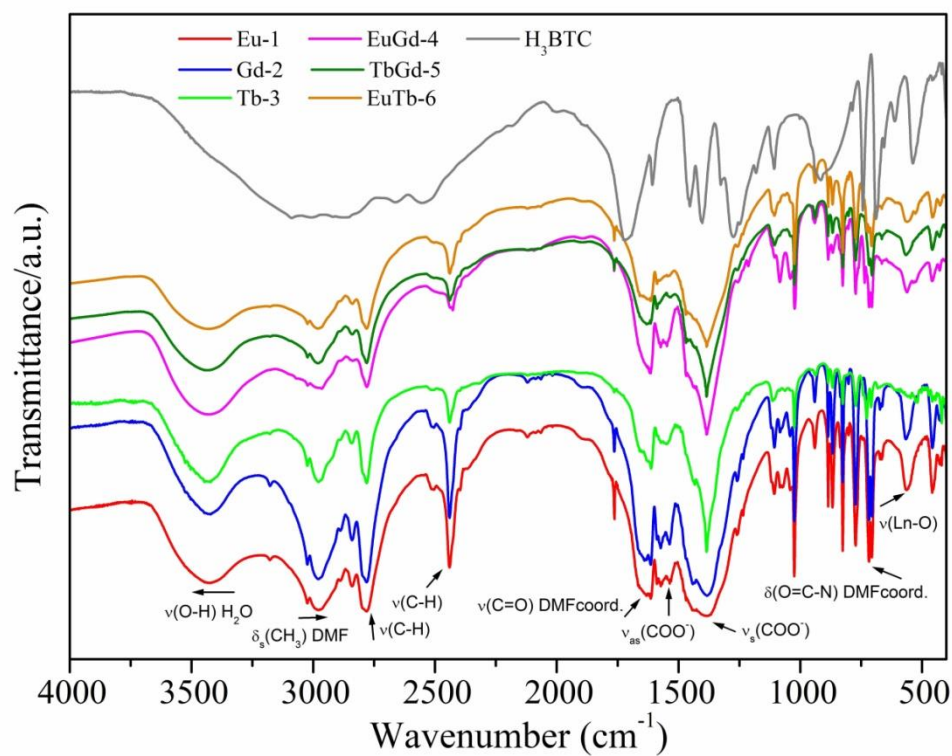

Figure S1. FTIR spectra of LnMOFs prepared by solvothermal synthesis.

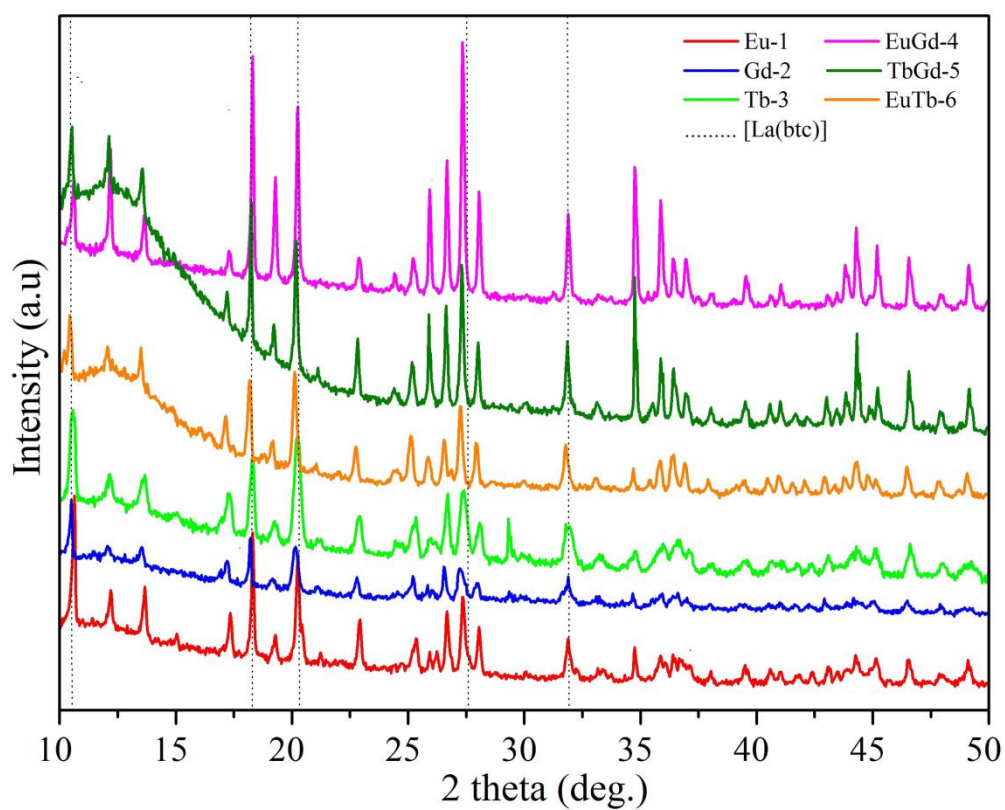

Figure S2. XRD patterns of LnMOFs prepared by solvothermal synthesis.

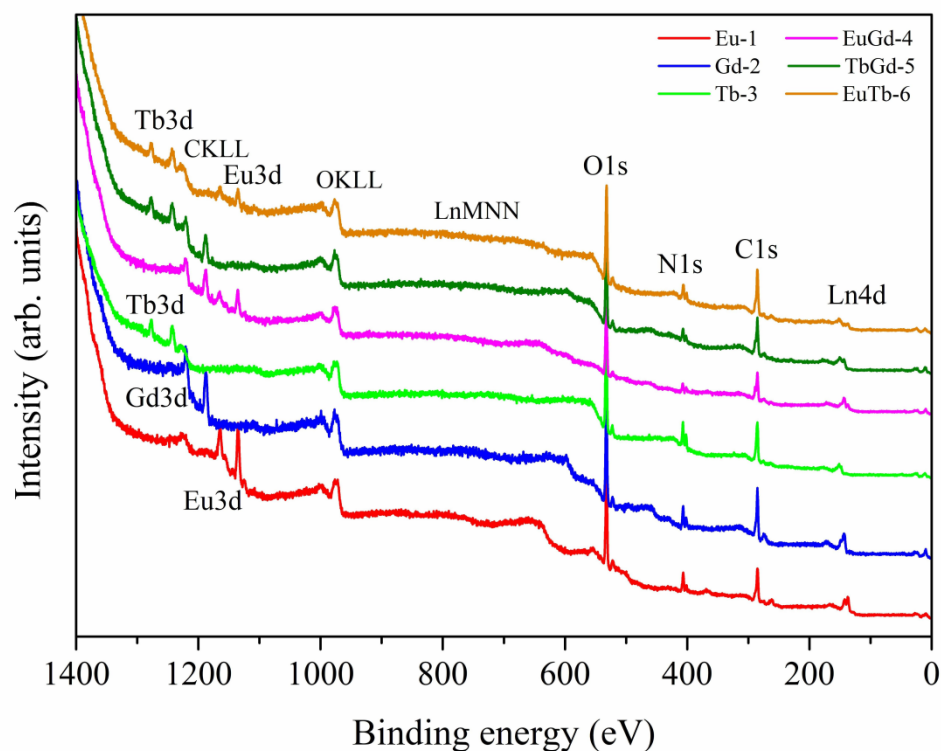

**Figure S3.** XPS survey spectra of LnMOFs prepared by solvothermal synthesis.

**Table S1.** XPS elemental atomic % of LnMOF samples.

| LnMOF  | C    | O    | N    | Eu  | Gd  | Tb  |
|--------|------|------|------|-----|-----|-----|
| Eu-1   | 41.2 | 40.6 | 12.3 | 5.9 | -   | -   |
| Gd-2   | 47.5 | 36.9 | 11.5 | -   | 4.1 | -   |
| Tb-3   | 47.2 | 35.8 | 13.2 | -   | -   | 3.8 |
| EuGd-4 | 51.6 | 36.7 | 6.9  | 2.5 | 2.3 | -   |
| TbGd-5 | 50.8 | 36.1 | 9.5  | -   | 1.9 | 1.7 |
| EuTb-6 | 53.7 | 33.8 | 8.7  | 1.8 | -   | 2.0 |

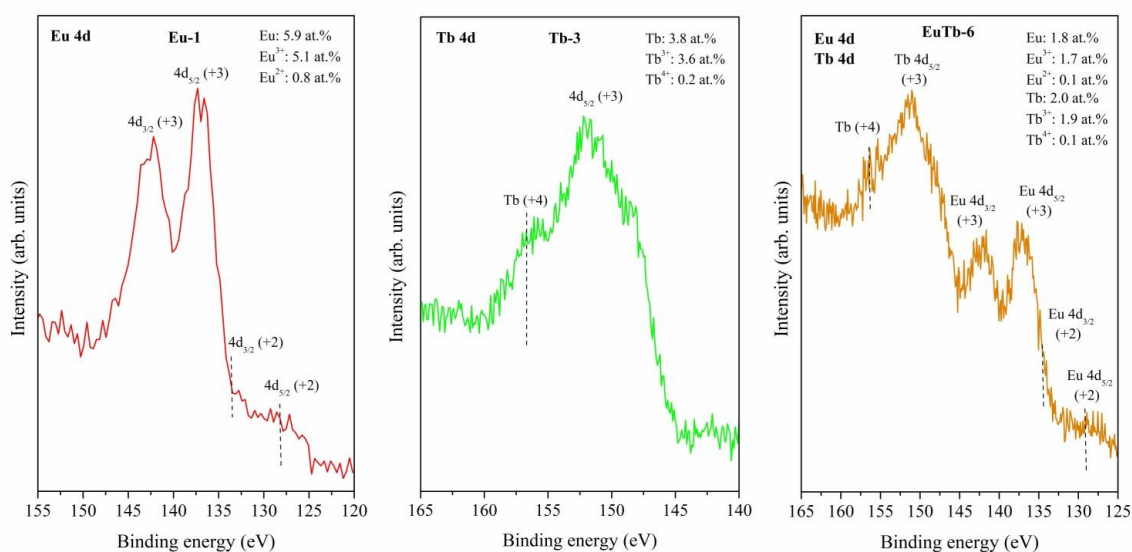

**Figure S4.** HR XPS spectra of Eu 4d and Tb 4d of [Eu(btc)], Tb(btc)] and [Eu<sub>0.5</sub>Tb<sub>0.5</sub>(btc)] samples.

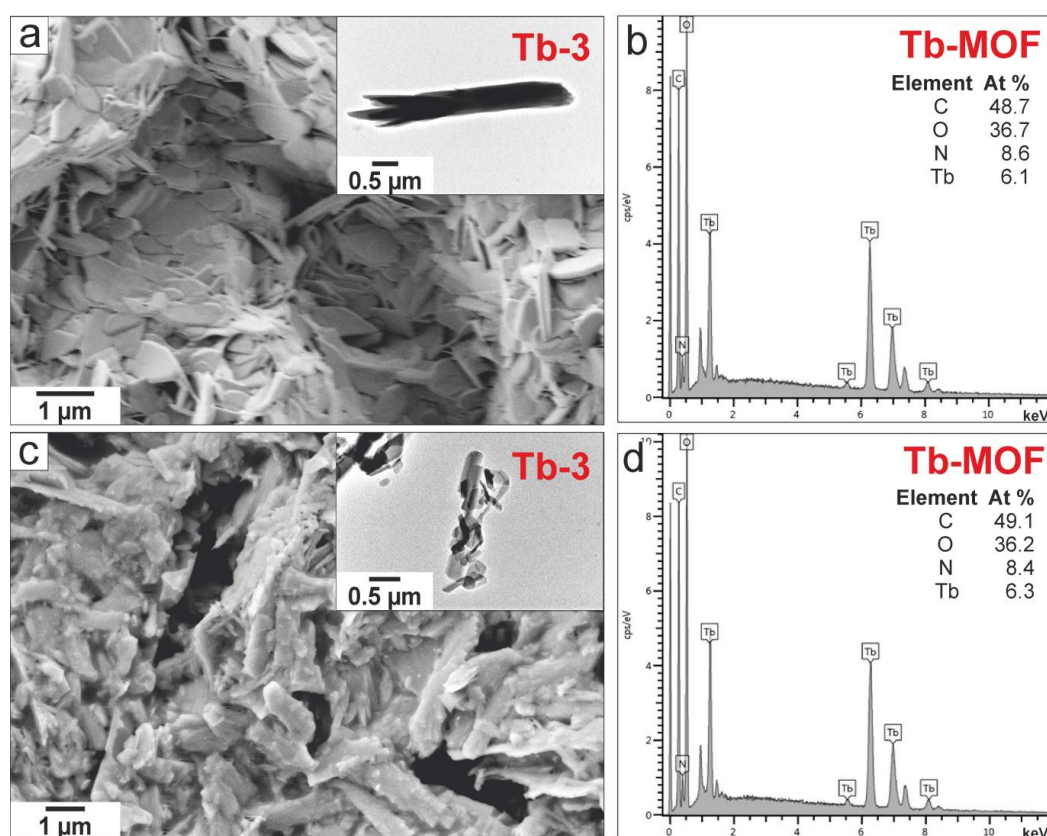

**Figure S5.** SEM morphology and TEM images (in insert) of TbMOF powders prepared by solvothermal synthesis a) (DMF/H<sub>2</sub>O), c) (DMF/H<sub>2</sub>O/NaOAc) and b,d) EDS spectra of [Tb(btc)].

**Table S2.** EDS analysis of Tb-3, EuGd-4, TbGd-5 and EuTb-6 samples from STEM/EDS spectra.

| LnMOF  | C    | O    | Eu  | Gd  | Tb  |
|--------|------|------|-----|-----|-----|
| Tb-3   | 75.9 | 20.4 | -   | -   | 3.7 |
| EuGd-4 | 76.5 | 19.9 | 1.5 | 2.1 | -   |
| TbGd-5 | 75.7 | 19.1 | -   | 2.2 | 3.0 |
| EuTb-6 | 74.6 | 20.2 | 2.5 | -   | 2.7 |

**Table S3.** The applications of luminescent bimetallic LnMOFs.

| LnMOF     | MOF Type                                                  | CIE (x,y)      | MOF Sensor                       | Reference |
|-----------|-----------------------------------------------------------|----------------|----------------------------------|-----------|
| Eu/Gd-MOF | [Eu <sub>0.5</sub> Gd <sub>0.5</sub> (btc)]               | (0.64, 0.35)   |                                  | [10]      |
|           | [Gd <sub>1.9</sub> Eu <sub>0.1</sub> (bdc)]               | red emission   | light emitting material          | [19]      |
|           | [Eu <sub>0.8</sub> Gd <sub>0.2</sub> (psa)]               | (0.66, 0.34)   |                                  | [20]      |
|           | [Eu <sub>0.0005</sub> Gd <sub>0.9995</sub> (ndc)]         | red emission   | thermal sensor                   | [24]      |
|           | [Eu <sub>0.05</sub> Gd <sub>0.95</sub> (btc)]             | (0.565, 0.334) | in biological sensing            | [38]      |
|           | [Eu <sub>0.5</sub> Gd <sub>0.5</sub> (btc)]               | (0.654, 0.348) |                                  | This work |
| Tb/Gd-MOF | [Tb <sub>0.5</sub> Gd <sub>0.5</sub> (btc)]               | (0.30, 0.61)   |                                  | [10]      |
|           | [Tb <sub>0.05</sub> Gd <sub>0.95</sub> (btc)]             | (0.245, 0.572) | light emitting material          | [38]      |
|           | [Tb <sub>0.5</sub> Gd <sub>0.5</sub> (btc)]               | (0.334, 0.562) |                                  | This work |
| Eu/Tb-MOF | [Eu <sub>0.8</sub> Tb <sub>0.2</sub> (psa)]               | (0.62, 0.35)   |                                  | [20]      |
|           | [Tb <sub>0.86</sub> Eu <sub>0.14</sub> (btc)]             | red-orange     | thermal sensor                   | [17]      |
|           | [Eu <sub>0.1</sub> Tb <sub>0.9</sub> (oba) <sub>2</sub> ] |                | sensing of dipicolinic acid      | [21]      |
|           | [Eu <sub>0.5</sub> Tb <sub>1.5</sub> (fda) <sub>3</sub> ] |                | sensing of metanol               | [22]      |
|           | [Eu <sub>0.5</sub> Tb <sub>0.5</sub> (h2l)]               |                | sensing of glycol                | [23]      |
|           | [Eu <sub>0.5</sub> Tb <sub>0.5</sub> (btc)]               | (0.666, 0.331) | sensing of Fe <sup>3+</sup> ions | This work |
